# Supplementary material for: PANoptosis is a prominent feature of desmoplakin cardiomyopathy
Source: PubMed Central journal article supplement (PMC9933912; doi:10.20517/jca.2022.34), 2023-01-01
Supplement: NIHMS1846283-supplement-Supplementary_Material.pdf [file NIHMS1846283-supplement-Supplementary_Material.pdf]

### A. Tamoxifen-inducible Cre deleter

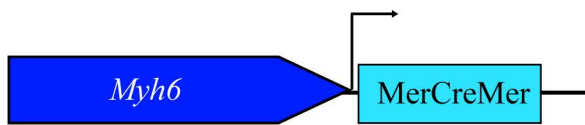

X

### B. Floxed *Dsp* gene

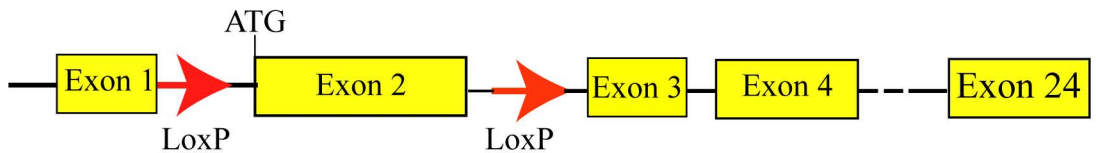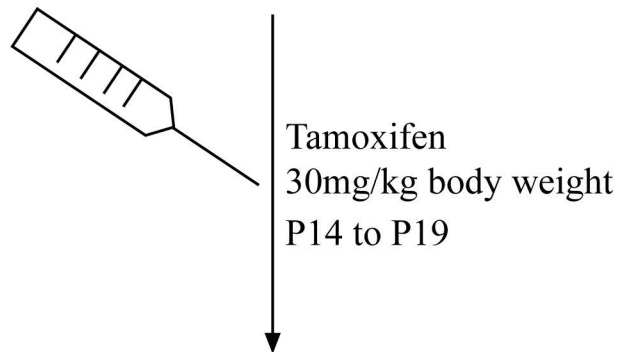

### C. Recombined *Dsp* allele

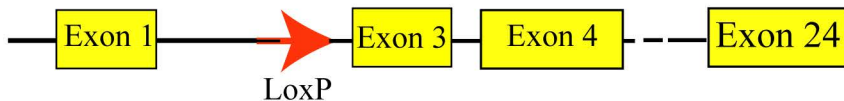

**Online Figure 1.** Schematic illustration of deletion of the *Dsp* gene in cardioac myocyte post-natally

**A.** Cardiac myocyte-specific tamoxifen-inducible cre deleter mice

**B.** Floxed *Dsp* gene wherein exon 2, containing the initiation codon, is floxed by the LoxP sequences

**C.** The recombined *Dsp* allele after deletion of exon 2

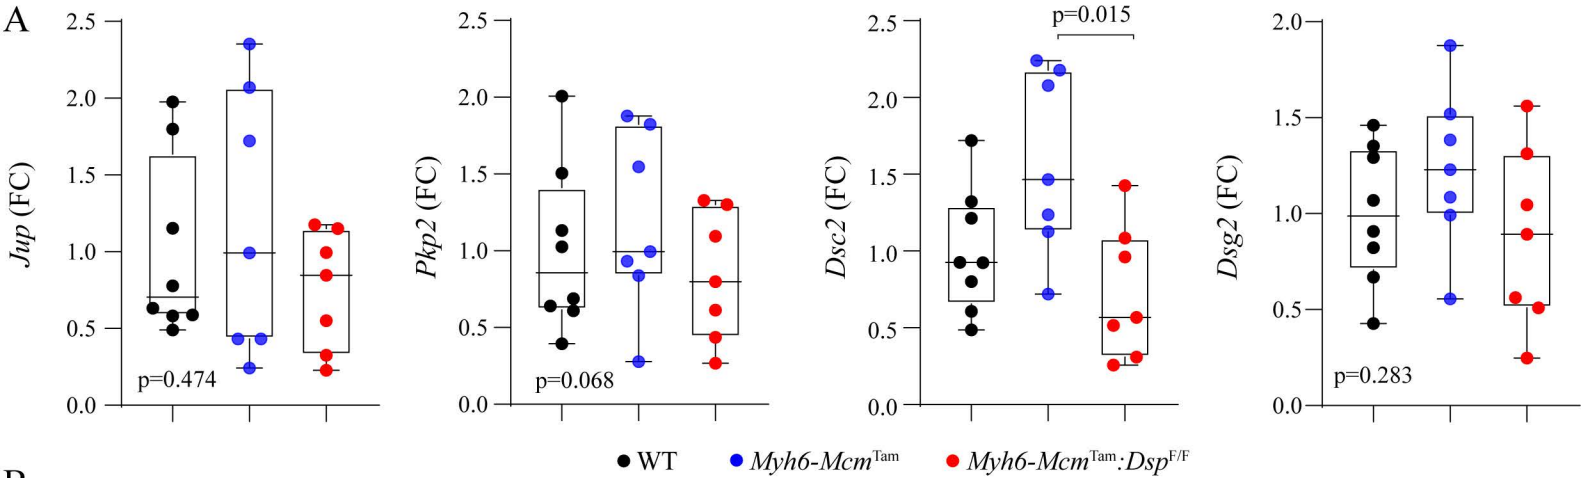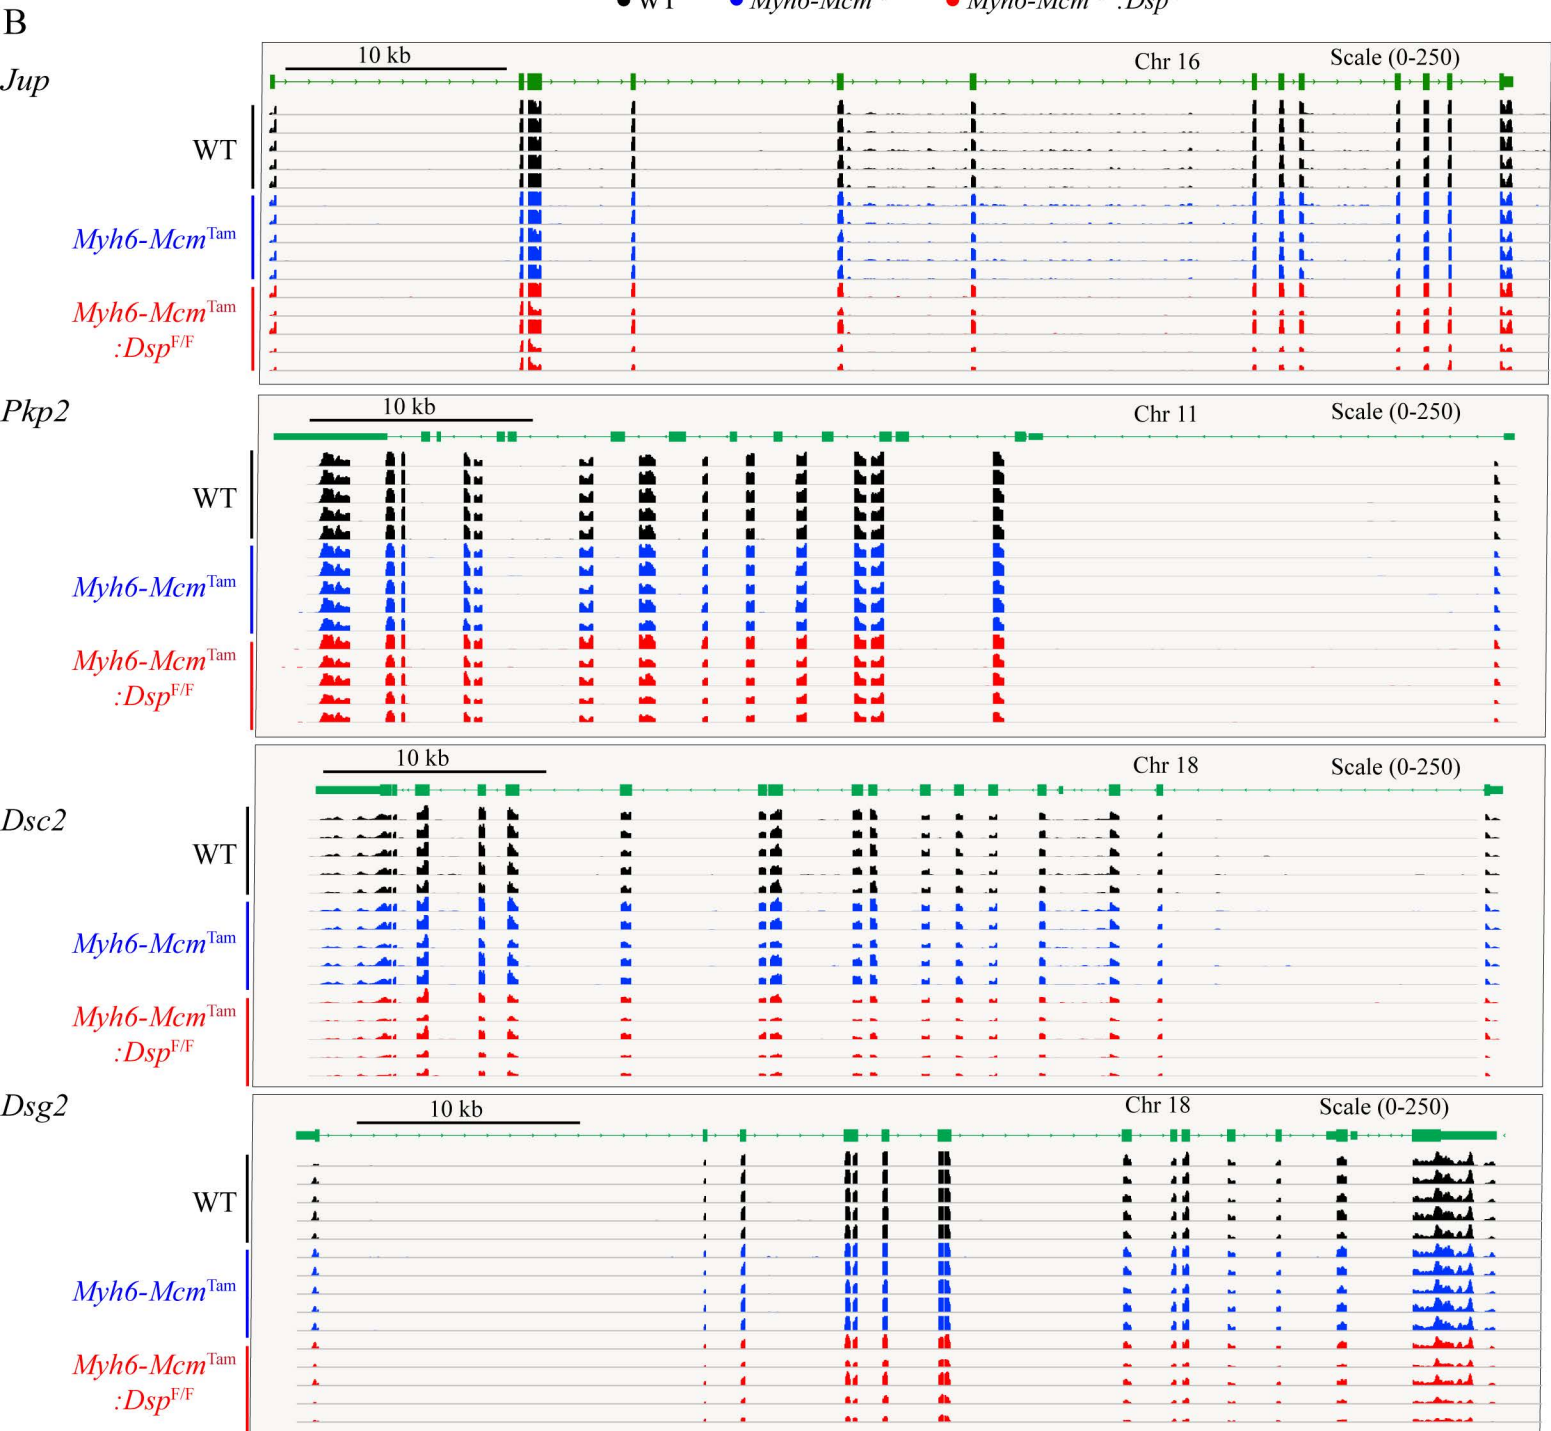

**Online Figure 2.** Transcript levels and genome browser maps of selected genes encoding desmosome proteins.

A. RT-PCR data showing transcript levels of the selected genes among the three genotypes, which were unchanged.

B. The genome browser depiction of the RNA-Seq reads mapped of the exons of the selected desmosome genes in the wild type (WT), *Myh6-Mcm<sup>Tam</sup>*, and the *Myh6-Mcm<sup>Tam</sup>:Dsp<sup>E/F</sup>* groups.

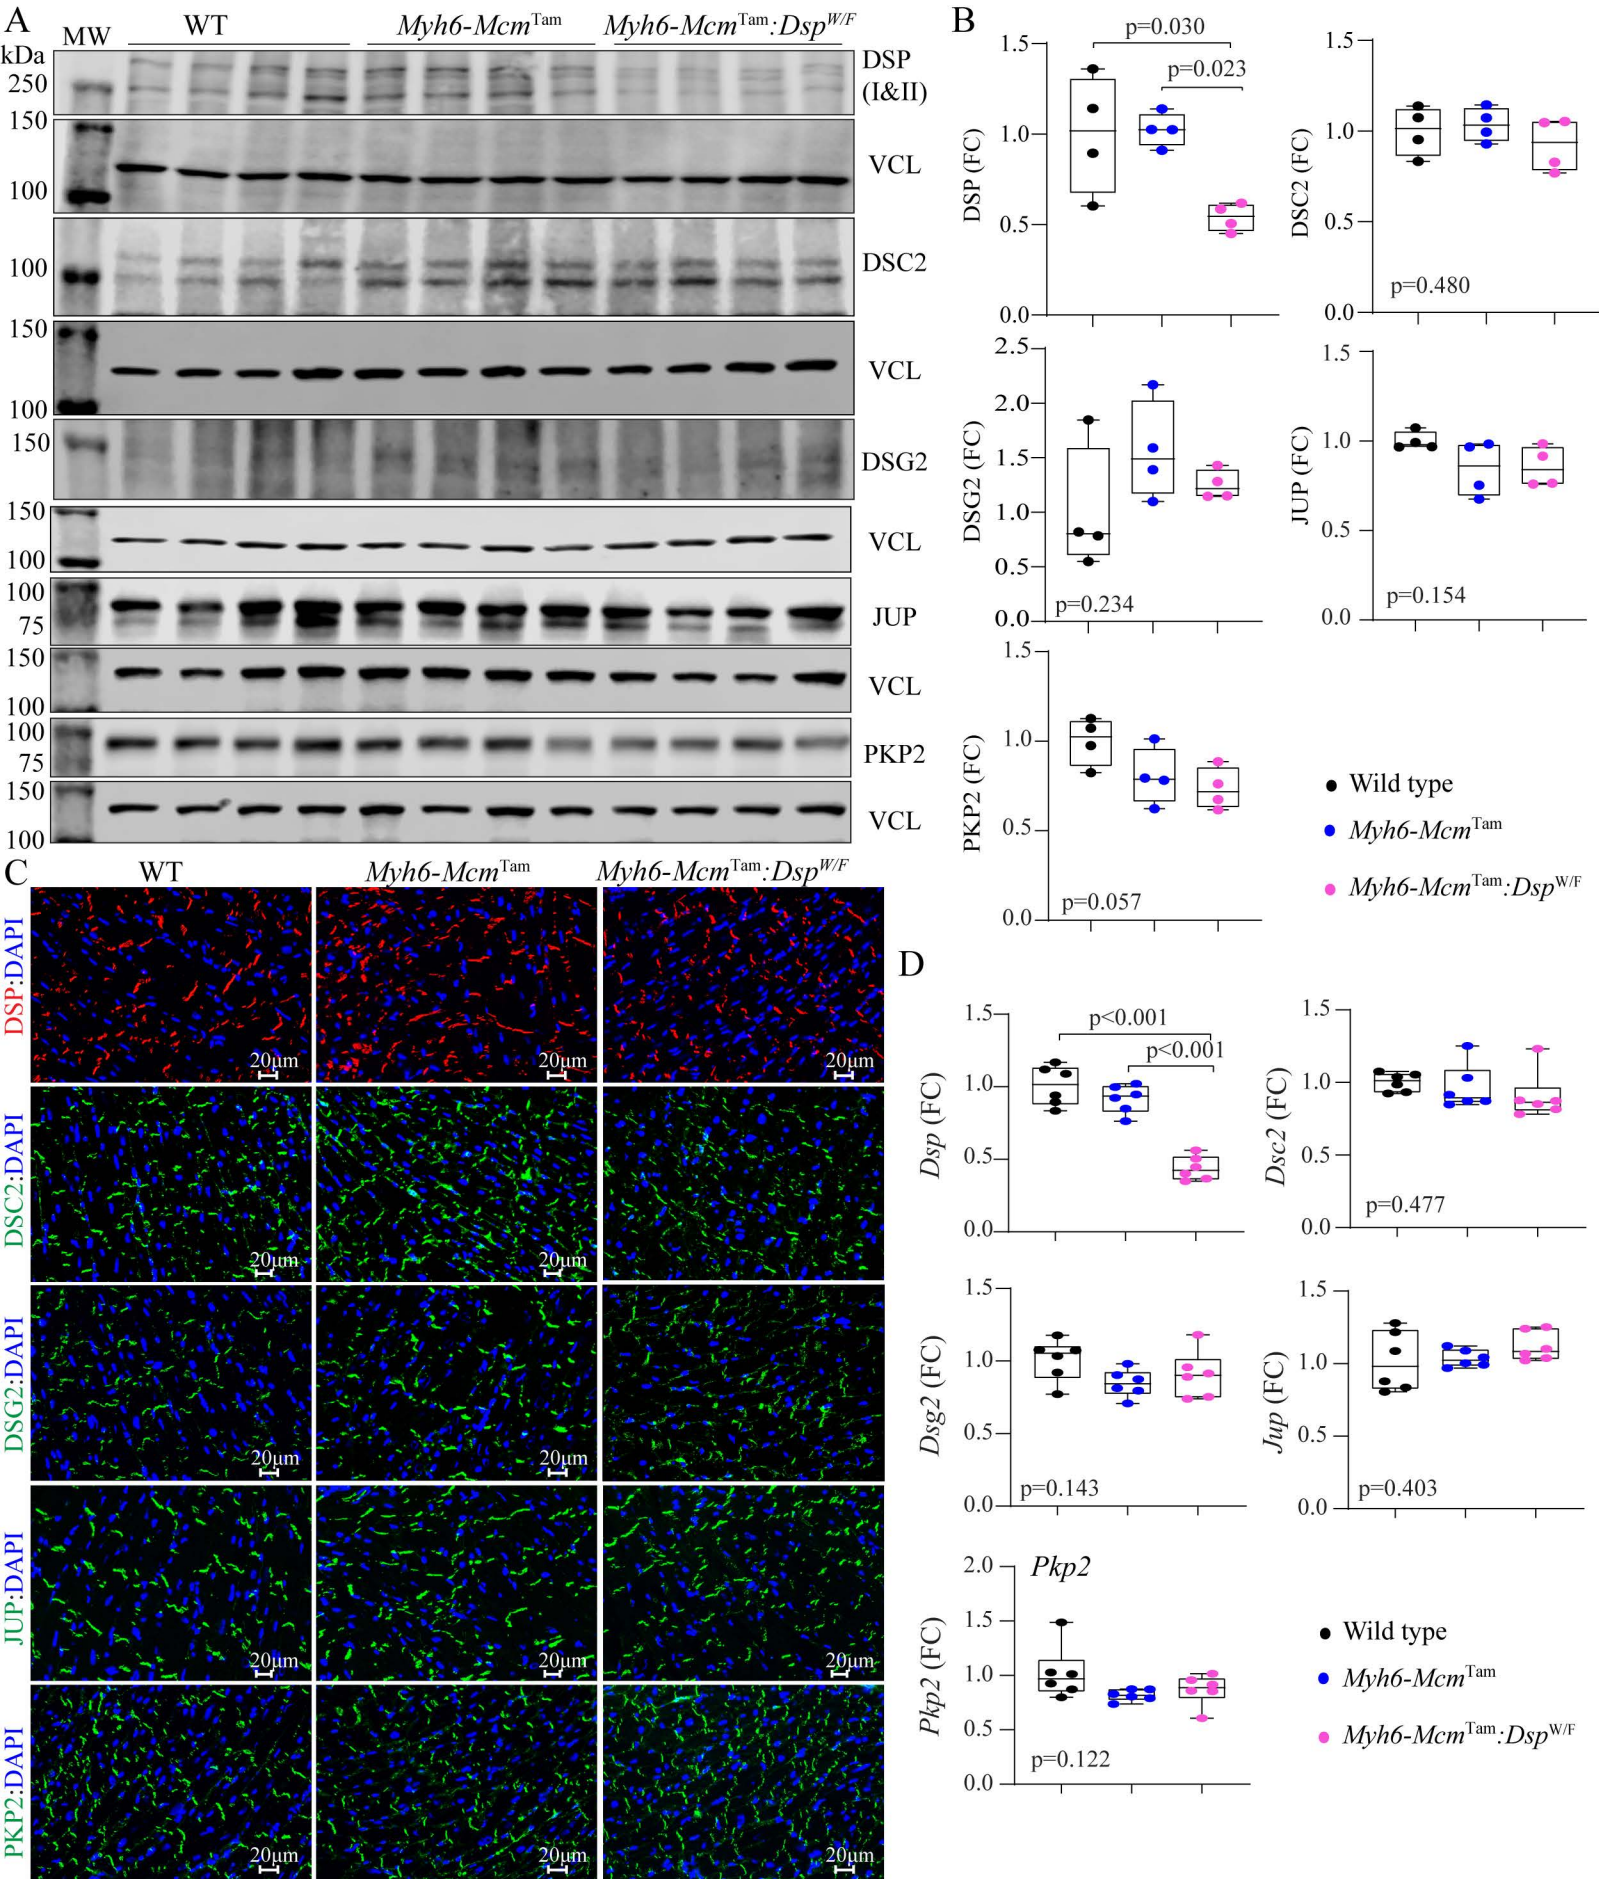

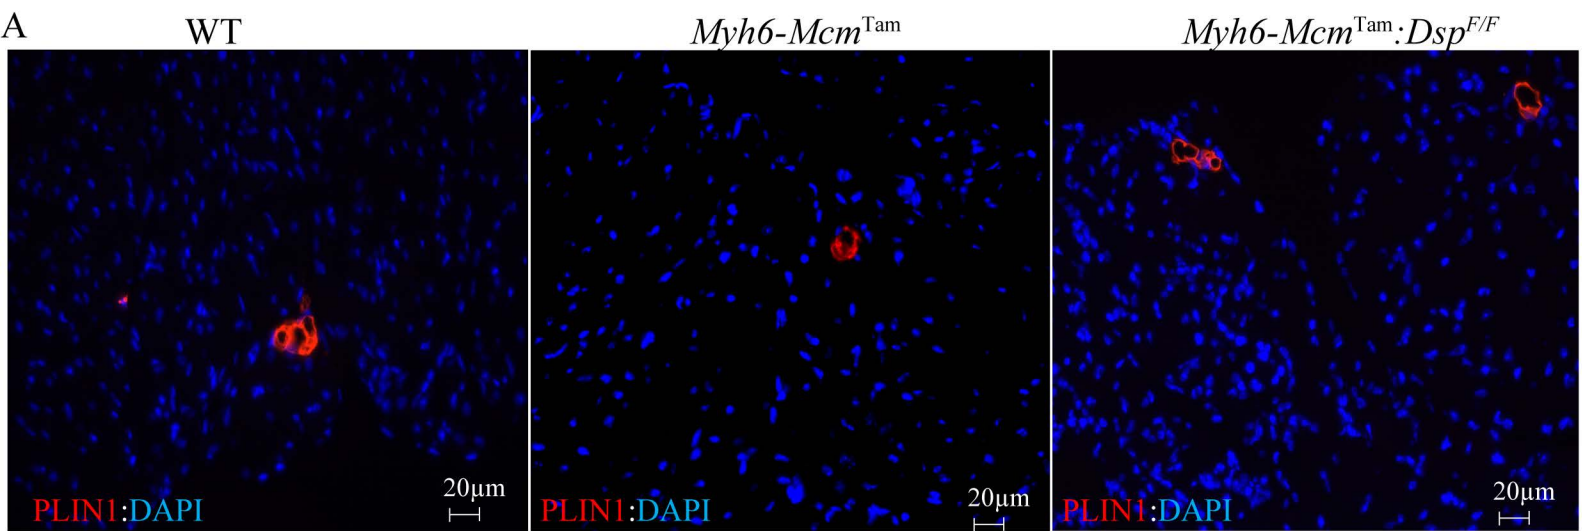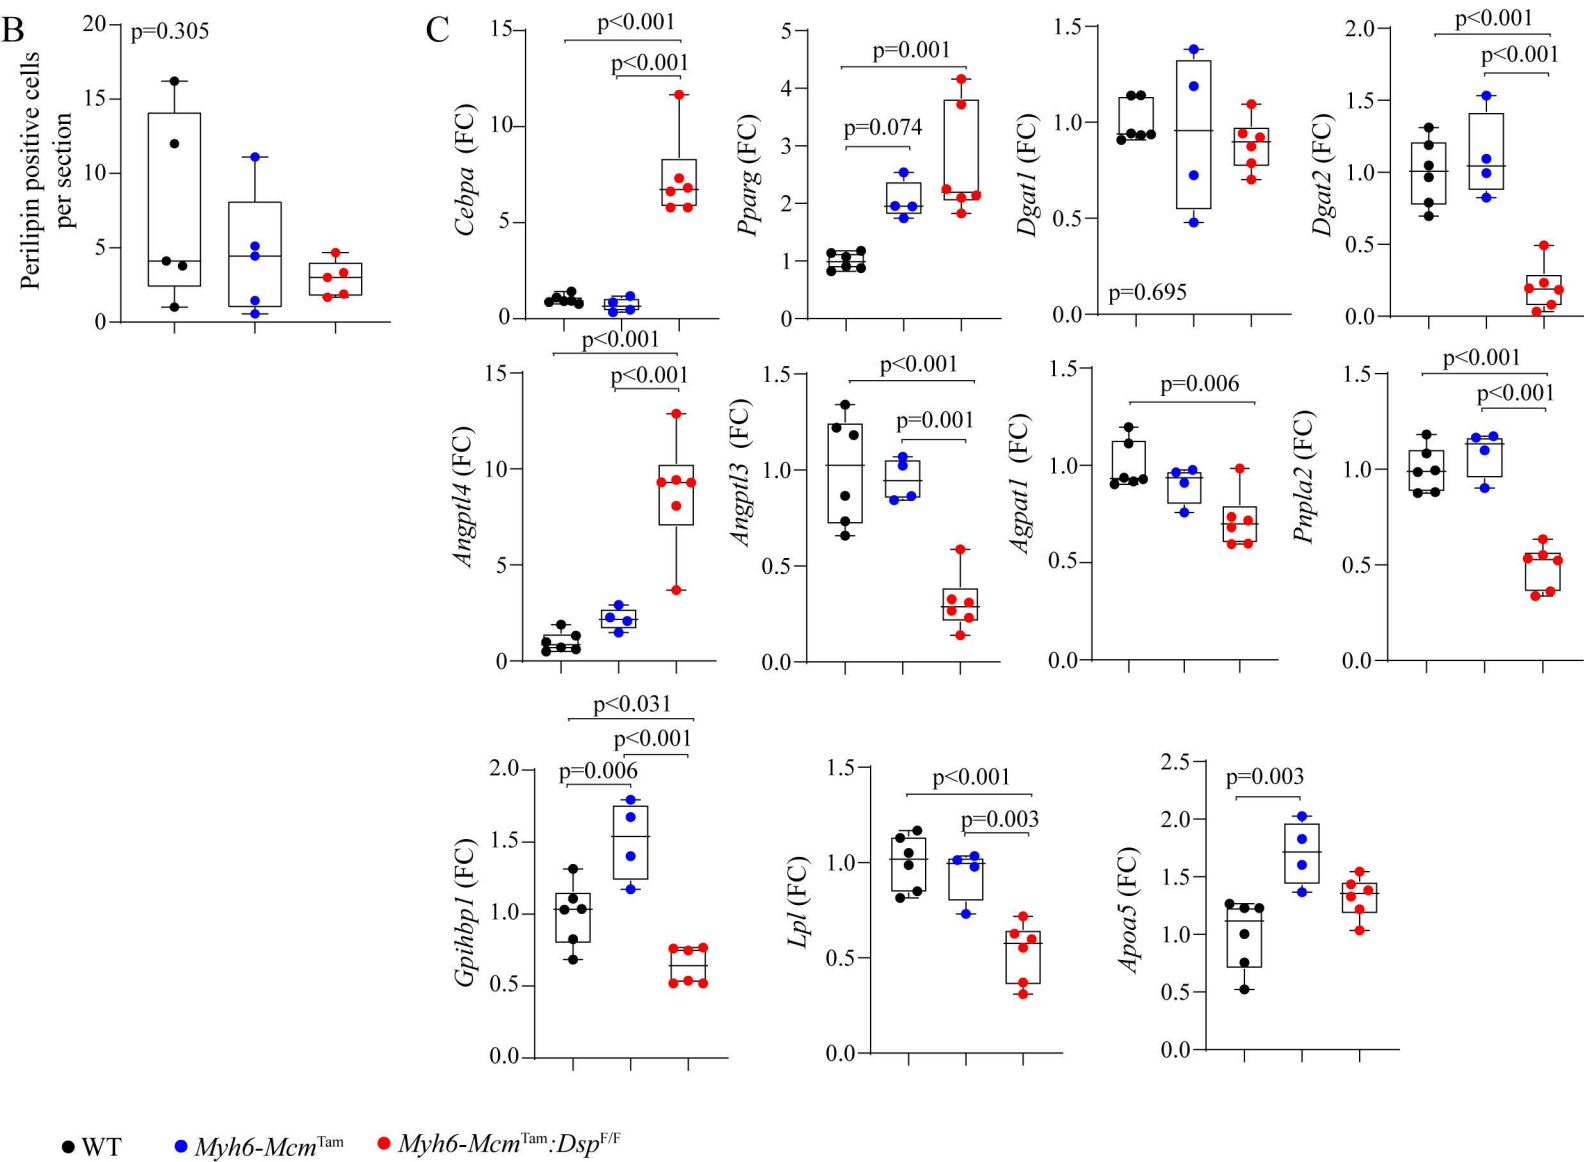

**Online Figure 4.** Adipogenic markers in the heart of *Myh6-Mcm<sup>Tam</sup>:Dsp<sup>F/F</sup>* mice.

A. Thin myocardial sections stained with perilipin1 (PLIN1), a marker of mature adipocytes.

B. Quantitative data showing the mean number of PLIN1-stained adipocytes per section in the control and experimental groups.

C. Dot plots showing the RT-PCR data representing transcript levels of selected genes involved in adipogenesis.

**Online Table 1: Oligonucleotide Primers, Antibodies, and TaqMan probes**

**Genotyping primers:**

| <b>Gene</b>            | <b>Forward sequence</b> | <b>Reverse sequence</b> |
|------------------------|-------------------------|-------------------------|
| <i>Cre recombinase</i> | TCTATTGCACACAGCAATCCA   | CCAGCATTGTGAGAACAAGG    |
| <i>Desmoplakin</i>     | GTTGGGCCTCTCGAATCAT     | TCTTTGTCTGTTGCCATGTGA   |

**List of antibodies**

| <b>Antibodies</b>                   | <b>Concentration</b> | <b>Supplier</b>           | <b>Catalog number</b> |
|-------------------------------------|----------------------|---------------------------|-----------------------|
| Anti-mouse IgG HRP linked antibody  | 1:4000 (IB)          | Cell Signaling Technology | 7076                  |
| Anti-Rabbit IgG HRP linked antibody | 1:2000 (IB)          | Cell Signaling Technology | 7074                  |
| ASC                                 | 1:1000 (IB)          | Cell Signaling Technology | 67824                 |
| BAD                                 | 1:500 (IB)           | Santa Cruz                | 8044                  |
| BCL2                                | 1:500 (IB)           | Santa Cruz                | 7382                  |
| CASP3                               | 1:1000 (IB)          | Cell Signaling Technology | 14220                 |
| CASP8                               | 1:1000 (IB)          | Cell Signaling Technology | 4927                  |
| COL1A1                              | 1:300 (IF)           | Abcam                     | 88147                 |
| Donkey anti Rat Alexa Fluor 594     | 1:1000 (IF)          | Invitrogen                | A11007                |
| DSC2                                | 1:200 (IB)           | Santa Cruz                | 70994                 |
| DSC2                                | 1:100 (IF)           | Santa Cruz                | 66863                 |
| DSG2                                | 1:500 (IB)           | Progen                    | 61002                 |
| DSG2                                | 1:50 (IF)            | Progen                    | 61002                 |
| DSP                                 | 1:1000 (IB)          | Abcam                     | ab71690               |
| DSP                                 | 1:250 (IF)           | Progen                    | 65146                 |
| Goat anti Mouse Alexa Fluor594      | 1:1000 (IF)          | Invitrogen                | A11005                |
| Goat anti Rabbit Alexa Fluor 488    | 1:1000 (IF)          | Invitrogen                | A11012                |
| GSDMD                               | 1:1000 (IB)          | Cell Signaling Technology | 39754                 |
| HMGB1                               | 1:500 (IB)           | Cell Signaling Technology | 6893                  |
| JUP                                 | 1:1000 (IB)          | Santa Cruz                | 1497-R                |
| JUP                                 | 1:1000 (IF)          | Santa Cruz                | 1497-R                |
| MLKL                                | 1:1000 (IB)          | Cell Signaling Technology | 37705                 |
| PCM1                                | 1:1000 (IF)          | Sigma                     | HPA023370             |
| PCM1                                | 1:50 (IF)            | Santa Cruz                | Sc-398365             |
| PKP2                                | 1:1000 (IB)          | Santa Cruz                | 18977                 |
| PKP2                                | 1:300 (IF)           | Progen                    | 651101                |
| PLIN                                | 1:100 (IF)           | Cell Signaling Technology | 9349                  |
| RIPK1                               | 1:1000 (IB)          | Cell Signaling Technology | 3493                  |
| RIPK3                               | 1:1000 (IB)          | Cell Signaling Technology | 15828                 |
| TGFB                                | 1:500 (IB)           | R&D Systems               | MAB1835               |
| TUBA1A                              | 1:1000 (IB)          | Cell Signaling Technology | 2125                  |
| Vinculin                            | 1:10000 (IB)         | Abcam                     | Ab129002              |
| ZBP1                                | 1:500 (IB)           | Santa Cruz                | 271483                |

### Oligonucleotide primers used in qPCR reactions

| Name           | Sequence                                                            |
|----------------|---------------------------------------------------------------------|
| <i>Agpat1</i>  | Forward: AACCTTTGTCGGTTCCGCT<br>Reverse: GACAGAGATACAGCCAGCCG       |
| <i>Angptl3</i> | Forward: TTTGGGAGGCTCGATGGAGAA<br>Reverse: TGCTTGCTGTCTTTCCAGTCT    |
| <i>Angptl4</i> | Forward: GACTGCCAGGAACTCTTCCAA<br>Reverse: GTCCAGCCTCCATCTGAAGT     |
| <i>Apoa5</i>   | Forward: AACCGAGCAGGGGCCAT<br>Reverse: TAGTCCCAGAGGCTCTTCCG         |
| <i>Asc</i>     | Forward: GAGCAGCTGCAAACGACTAA<br>Reverse: GACCCTGGCAATGAGTGCTT      |
| <i>Bak</i>     | Forward: CAAGATCGCCTCCAGCCTATT<br>Reverse: CCCAGGAAGCCGGTCAAAC      |
| <i>Bax</i>     | Forward: ACAGGGGCCTTTTTGCTACA<br>Reverse: CACTCGCTCAGCTTCTTGGT      |
| <i>Bid</i>     | Forward: CCGCAAACCTTTGCCTTAGC<br>Reverse: AACCGTTGCTGACCTCAGAGT     |
| <i>Bok</i>     | Forward: CAGCGTATACCGGAACGTGG<br>Reverse: TTGCCCATGTGATACCTGC       |
| <i>Casp1</i>   | Forward: ACTGACTGGGACCCTCAAGT<br>Reverse: GCAAGACGTGTACGAGTGGT      |
| <i>Casp3</i>   | Forward: AGCTTGGAACGGTACGCTAA<br>Reverse: GAGTCCACTGACTTGCTCCC      |
| <i>Casp8</i>   | Forward: GCGTGGAACAGGAAGTGAGTA<br>Reverse: GAAGAGCTGTAACCTGTGGC     |
| <i>Coll1a1</i> | Forward: TGACTGGAAGAGCGGAGAGTA<br>Reverse: GAGTAGGGAACACACAGGTCT    |
| <i>Col3a1</i>  | Forward: CTGTAACATGGAACTGGGGAAA<br>Reverse: CCATAGCTGAACTGAAAACCACC |
| <i>Gdf15</i>   | Forward: CTCAACGCCGACGAGTAC<br>Reverse: ACCCCAATCTCACCTCTGGA        |
| <i>Gpihbp1</i> | Forward: CACAGCGGAACCGACAAAG<br>Reverse: GACTGGCAACAGGTCTGAGT       |
| <i>Gsdmd</i>   | Forward: TTCCAGTGCCTCCATGAATGT<br>Reverse: ACAAACAGGTCATCCCCACG     |
| <i>Il1rn</i>   | Forward: ATCCTTCTGTTTCATTCAGAGGC<br>Reverse: TCCCAGATTCTGAAGGCTTGC  |
| <i>Itgax</i>   | Forward: TACGTATTCAGCGTGGAGAACTT<br>Reverse: TGAAGCCCTCCTGGGACATC   |
| <i>Lgals3</i>  | Forward: TACTAGAAGCGGCCGAGC<br>Reverse: TGTCTGCCATTTTCTGGGTA        |
| <i>Lpl</i>     | Forward: TACCCCTAGACAACGTCCA<br>Reverse: CCAGCTGGATCCAAACCAGT       |
| <i>Lrp1</i>    | Forward: CAAAGCTGAAGGCTCCGAGT<br>Reverse: TATGCGGACACTCTCATCGC      |

|                      |                                                                       |
|----------------------|-----------------------------------------------------------------------|
| <i>Mgp</i>           | Forward: GCAACCCTGTGCTACGAATC<br>Reverse: CTTTTGGGCTTTAGCTCGCC        |
| <i>Mlkl</i>          | Forward: GTATTCAACAACCCCCAGGC<br>Reverse: CGCAAGATGTTGGGAGAATCG       |
| <i>Mmp14</i>         | Forward: GCCCTCTGTCCCAGATAAGC<br>Reverse: CCAGAACCATCGCTCCTTGA        |
| <i>Mmp2</i>          | Forward: TGCCCCCATGAAGCCTTG<br>Reverse: TGGTACAGCTGTTGTAGGAGG         |
| <i>Mpeg1</i>         | Forward: ACAAAGCCAGACAGAGCCTT<br>Reverse: AGGATGGAAAAGAAAGCGGTTG      |
| <i>Noxa</i>          | Forward: ATA ACTGTGGTTCTGGCGCA<br>Reverse: CAATCCTCCGGAGTTGAGCA       |
| <i>Pnpla2</i>        | Forward: AATCTCTACCGCCTCTCGAA<br>Reverse: AGGGTTGGGTTGGTTCAGTA        |
| <i>Postn</i>         | Forward: AGAGAAATCCCTGCACGACA<br>Reverse: GTTGGTGCAAACAAGGTCCA        |
| <i>Ripk1</i>         | Forward: TGACTTTCACATTAAGATAGCCGA<br>Reverse: AGTGGTGCTGCTCACTTCTTT   |
| <i>Ripk3</i>         | Forward: AGCTTTGGGATCCTCGTGTG<br>Reverse: TCTGTCAGTGGAGGACGACT        |
| <i>Sfrp2</i>         | Forward: CCCTTTGTAAAAATGACTTCGCAC<br>Reverse: CAGGATGATCTTGGTGTCTCTGT |
| <i>Slamf7</i>        | Forward: GACTGACGACCTGAAAACGC<br>Reverse: CGGCCACCTTCTTCAGAGTT        |
| <i>Spp1</i>          | Forward: AGCAAGAACTCTTCCAAGCAA<br>Reverse: GTGAGATTCGTCAGATTCATCCG    |
| <i>Tgfb1</i>         | Forward: TGGAGCAACATGTGGA ACTC<br>Reverse: GTCAGCAGCCGGTTACCA         |
| <i>Tgfb2</i>         | Forward: AGGAGTGGCTTACCACAAAGACA<br>Reverse: ATTAGACGGCACGAAGGTACAGCA |
| <i>Tgfb3</i>         | Forward: AGCTCTTCCAGATACTTCGACC<br>Reverse: AAAGACAGCCATTCAGCGGT      |
| <i>Timp1</i>         | Forward: CATGGAAAGCCTCTGTGGATA<br>Reverse: CTCAGAGTACGCCAGGGAAC       |
| <i>Tnfrsf10b/Dr5</i> | Forward: TCGTCTCTTTGGACCGACA<br>Reverse: GTCAGCTGAGTCGTTTCCGT         |
| <i>Tnfrsf19/Troy</i> | Forward: AGTTGTCCAAGGAATGTGGCT<br>Reverse: CCGCACATGGCTTACACTTC       |
| <i>Traf4</i>         | Forward: AGGTCCAGGTGTTAGGCTTG<br>Reverse: GCTGCAAGTGTTCAAGTGGC        |
| <i>Traf6</i>         | Forward: CATAAGGGATGCAGGGCACA<br>Reverse: TTGGGCACTTTACCGTCAGG        |
| <i>Vcl</i>           | Forward: GGTCTAGCAAGGGCAATGAC<br>Reverse: TGAATAAGTGCCCGCTTGGT        |
| <i>Vim</i>           | Forward: TGCACGATGAAGAGATCCAGG<br>Reverse: CTTTCATACTGCTGGCGCAC       |
| <i>Zbp1 ex2-3</i>    | Forward: GAGATGGGGCTCCTGCAATC<br>Reverse: CCCATTGGCTTCCAGGAATCTT      |
| <i>Zbp1 ex3-4</i>    | Forward: CGTCAGGAAGGCCAAGACAT<br>Reverse: TTGACCGGATTGTGCTGACA        |

|                   |                                                                 |
|-------------------|-----------------------------------------------------------------|
| <i>Zbp1 ex4-5</i> | Forward: CAAACGCCATCCAGATTGGTC<br>Reverse: CGTCCCATGCCAAGGGTAGA |
| <i>Zbp1 ex5-6</i> | Forward: GCCACCACAACGAGATGAGC<br>Reverse: TGTTGAATGAAGCTCCTGGGT |

### TaqMan probes

| Gene          | TaqMan Assay ID |
|---------------|-----------------|
| <i>Atp2a2</i> | Mm00437634_m1   |
| <i>Cebpa</i>  | Mm00514283_s1   |
| <i>Ctgf</i>   | Mm01192932-g1   |
| <i>Dgat1</i>  | Mm00515643_m1   |
| <i>Dgat2</i>  | Mm00499536_m1   |
| <i>Dsc2</i>   | Mm00516355_m1   |
| <i>Dsg2</i>   | Mm00514608_m1   |
| <i>Dsp</i>    | Mm01351876_m1   |
| <i>Jup</i>    | Mm00550256_m1   |
| <i>Myh6</i>   | Mm00440354_m1   |
| <i>Myh7</i>   | Mm0060555_m1    |
| <i>Nppa</i>   | Mm01255748_g1   |
| <i>Nppb</i>   | Mm01255770_g1   |
| <i>Pkp2</i>   | Mm00503159_m1   |
| <i>Pparg</i>  | Mm00440940_m1   |
| <i>Vcl</i>    | Mm00447745_m1   |
